# Supplementary material for: Mutational signature learning with supervised negative binomial non-negative matrix factorization
Source: PubMed Central journal article supplement — Bioinformatics. 2020 Jul 13;36(Suppl 1):i154–60. doi: 10.1093/bioinformatics/btaa473 (PMC7355241; doi:10.1093/bioinformatics/btaa473), 2020-07-13
Supplement: btaa473_supplementary_data.pdf [file btaa473_supplementary_data.pdf]

# Supplemental Results

## Statistics of the mutation count data

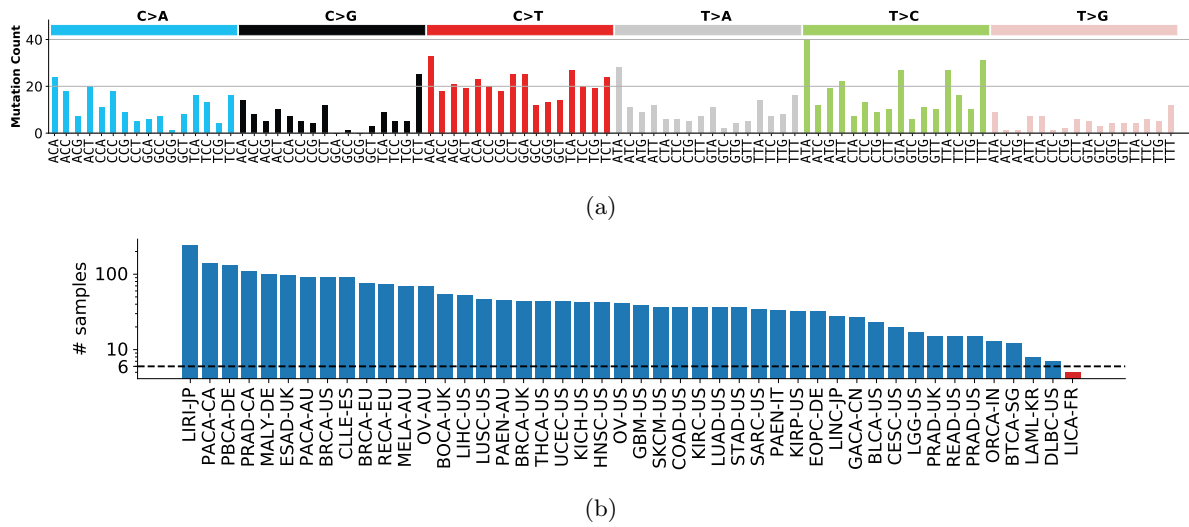

**Supplemental Figure 1:** (a) An example of mutational profile with trinucleotide sequences as mutation types. (b) Distribution of project codes across all 2,521 patient samples. The dotted line at 6 indicates the inclusion threshold. Excluded samples are summarized in the red bars.

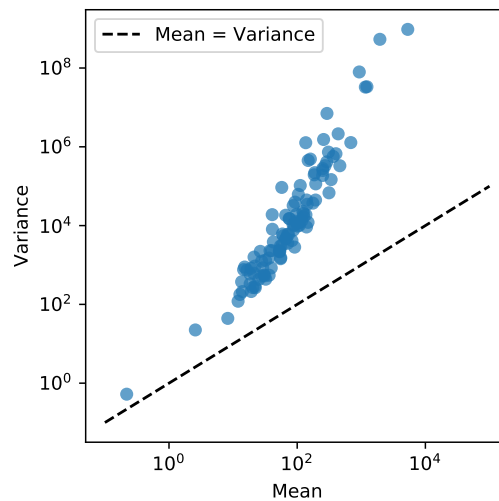

**Supplemental Figure 2:** Mean and variance of mutational counts of samples with the similar annotation.

## Comparison between ICGC, NBNMF and SNBNMF signatures

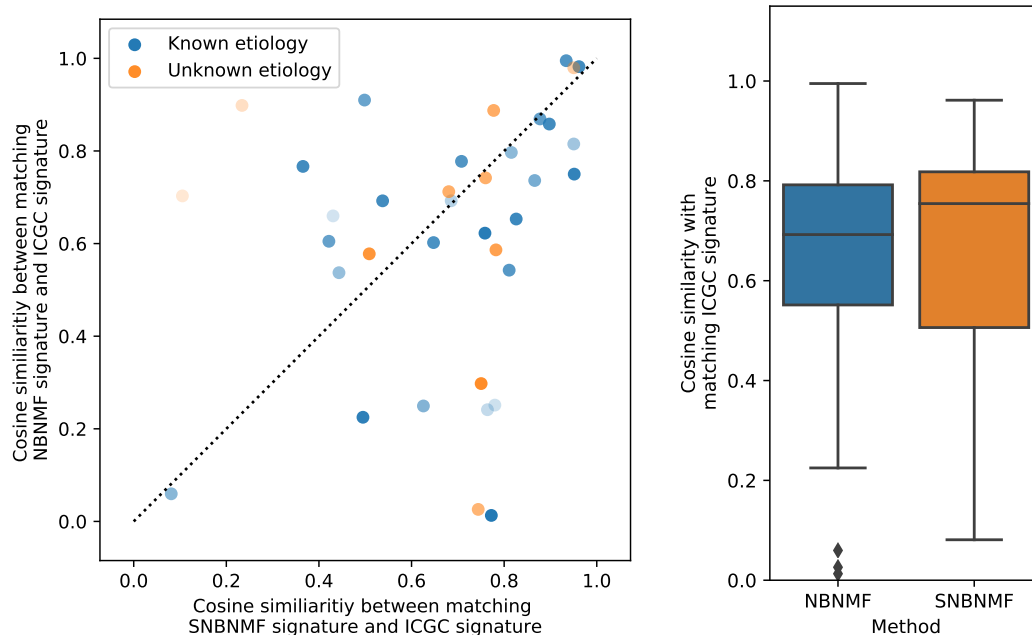

**Supplemental Figure 3:** Cosine similarity with ICGC signature set. The left figure shows the pairwise comparison between SNBNMF-ICGC signature cosine similarity and NBNMF-ICGC signature cosine similarity, where the points in blue and orange respectively represent signatures with known and unknown etiology and higher signature indexing has higher transparency. Noted that the higher the cosine similarity, the closer the learned signature is to the corresponding ICGC signature. 16 out of 26 signatures with known etiology are more similar to the corresponding ICGC signatures when learned with the proposed method, which also does better in learning signatures with better known etiology (i.e. lower index number.) The right figure compares the distributions of the cosine similarity of NBNMF and SNBNMF, where we observe that our proposed method results in higher median cosine similarity.

## Supervised regularization closer to reference signature

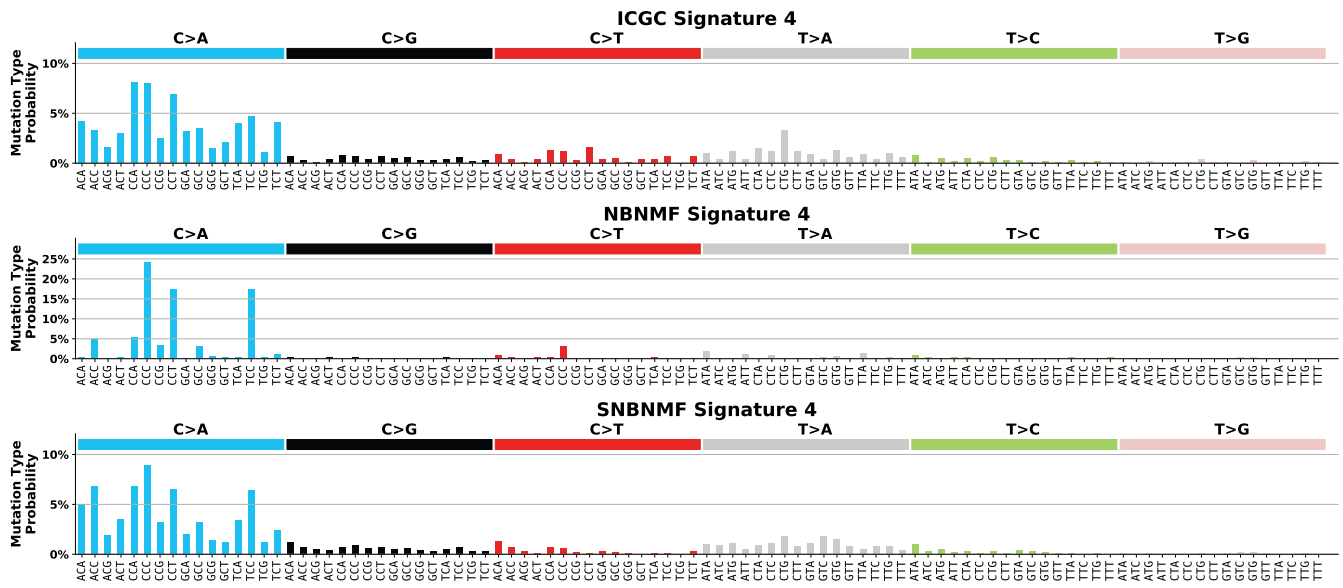

**Supplemental Figure 4:** Mutational signature 4 generated by the ICGC consortium (Top), a Negative Binomial NMF approach (Middle) and the proposed SNBNMF solution (Bottom).

# Robustness of mutational signature

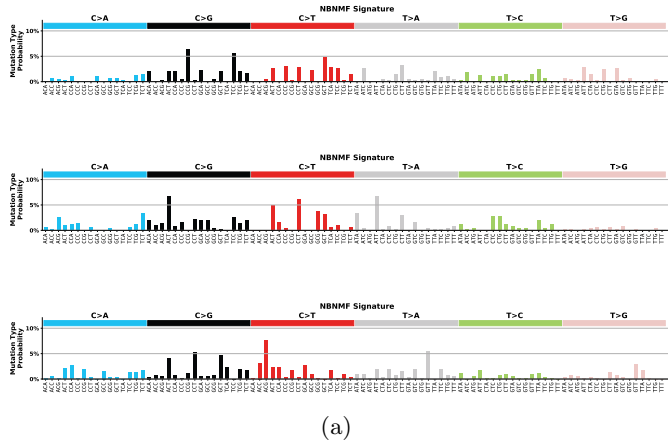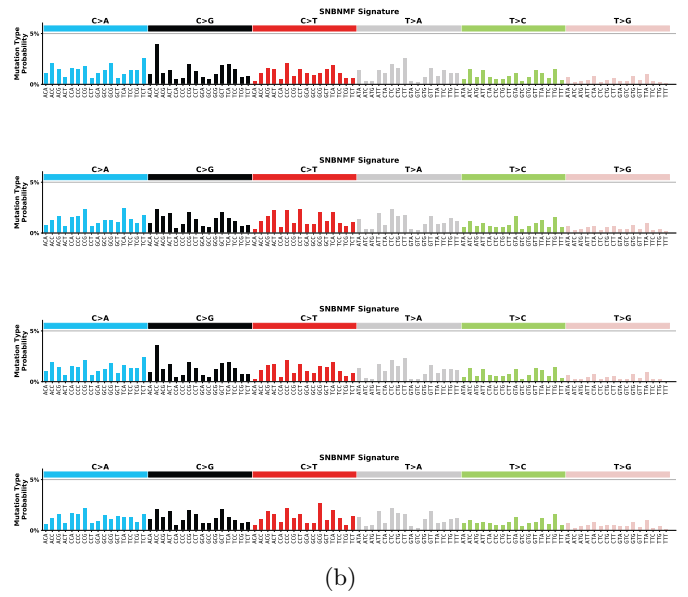

Supplemental Figure 5: NBNMF (a) and SNBNMF (b) signatures learned from the subcohorts with only 6 cancer types that are matched with the COSMIC signature 3.

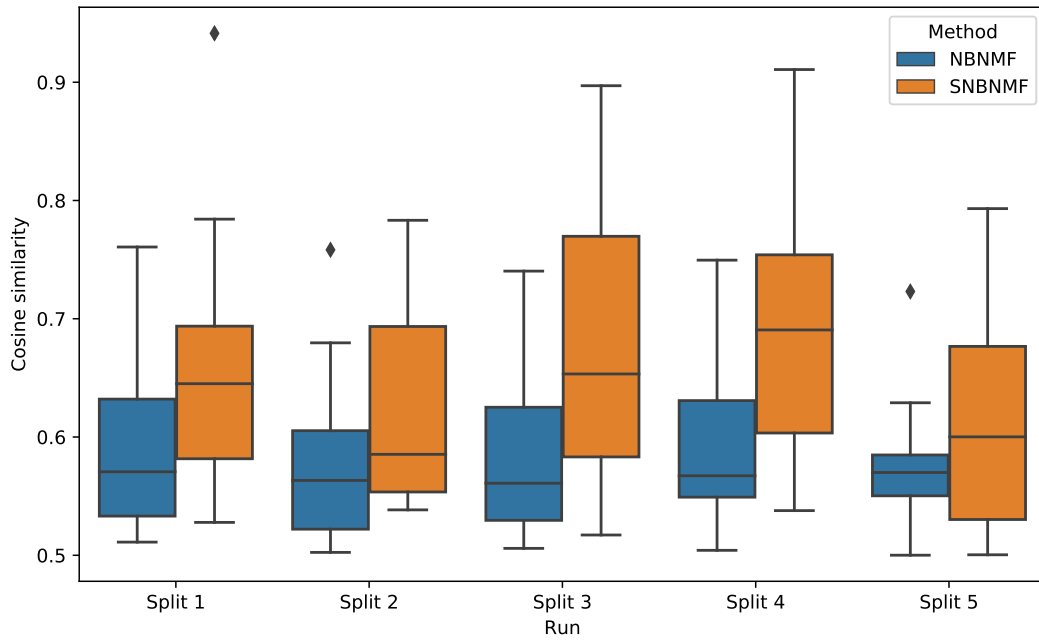

**Supplemental Figure 6:** Cosine similarity to all signatures using NBNMF (Blue) and SNBNMF (Orange) across multiple runs using different random subsets. Using the supervised regularization term generally improves the cosine distance to the reference signatures using subset of our cohort.



## MUTYH mutation status

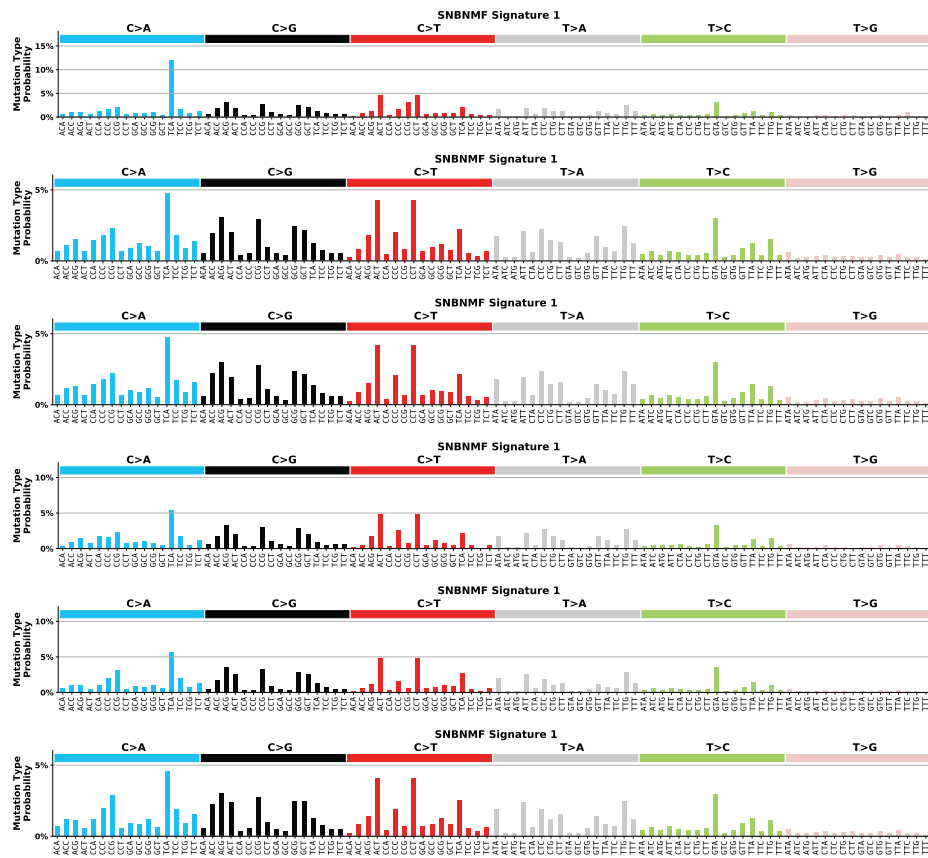

**Supplemental Figure 8:** Signature 1 (constrained to be predictive of MUTYH mutation status) using different number of factors (40-35), with the top one using 40 factors and the bottom one representing the signature trained using only 35 factors. The reference signature is derived from the MUTYH-associated polyposis colorectal cancer patient.

OxoG score

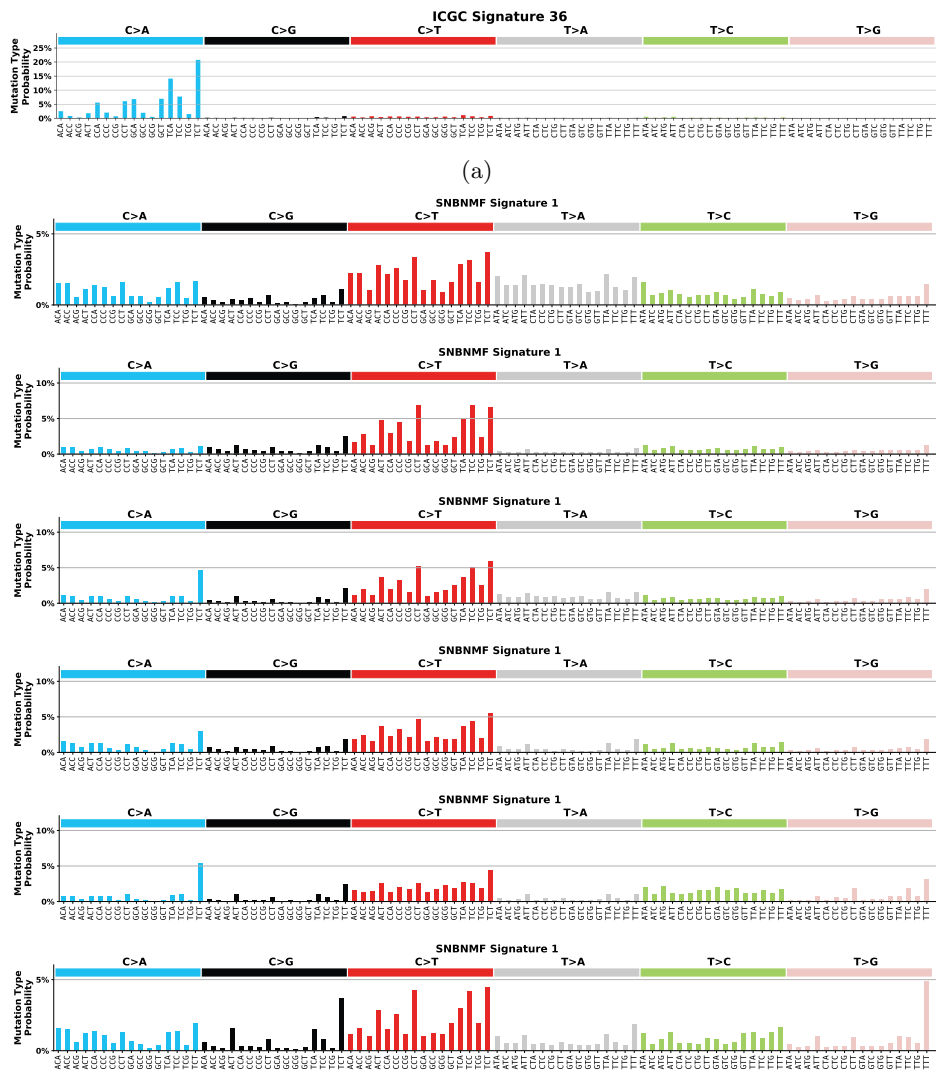

Supplemental Figure 9: Signature 1 (constrained to be predictive of OxoG scores) using different number of factors (40-35), with the top one using 40 factors and the bottom one representing the signature trained using only 35 factors.





# Mutational Signatures Catalogues

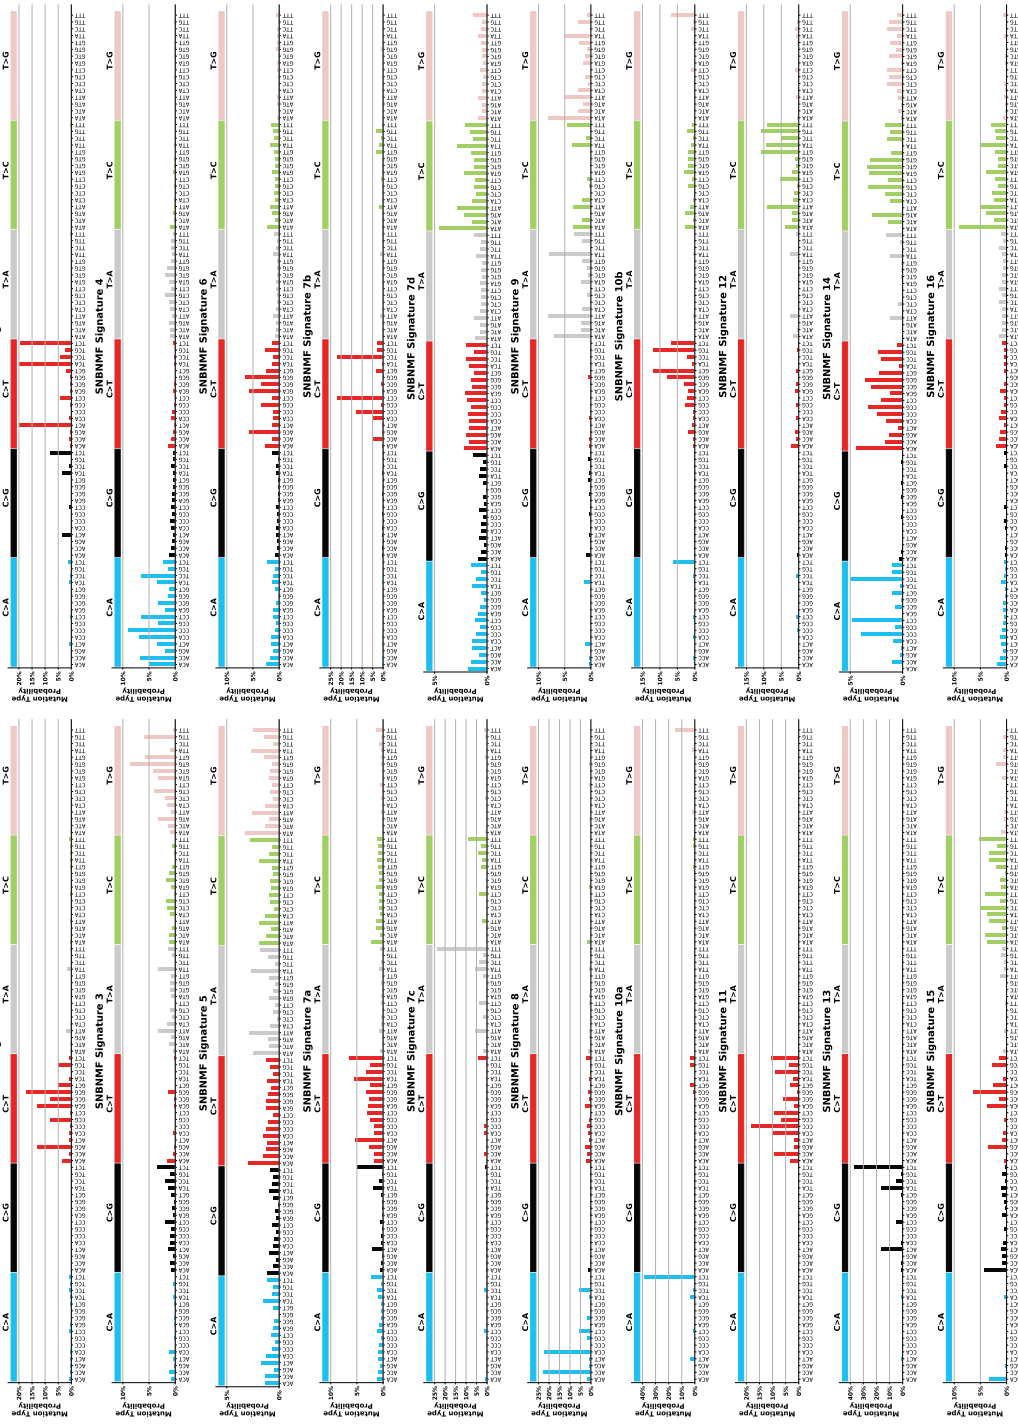

Supplemental Figure 11: Mutational signatures 1-16 learned by SNBMMF.
